# Supplementary material for: Igelströmite, Fe3+(Sb3+Pb2+)O4, and manganoschafarzikite, Mn2+Sb3+2O4, two new members of the newly established minium group, from the Långban Mn–Fe deposit, Värmland, Sweden
Source: Copernicus journal article supplement (doi:10.5194/ejm-36-311-2024), 2024-03-25
Supplement: Supplementary file 1 [file ejm-36-311-2024-supplement.zip]

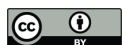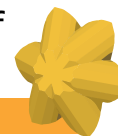

*Supplement of*

**Igelströmite,  $\text{Fe}^{3+}(\text{Sb}^{3+}\text{Pb}^{2+})\text{O}_4$ , and manganoschafarikite,  $\text{Mn}^{2+}\text{Sb}_2^{3+}\text{O}_4$ ,  
two new members of the newly established minium group, from the Lång-  
ban Mn–Fe deposit, Värmland, Sweden**

**Dan Holtstam et al.**

*Correspondence to:* Dan Holtstam ([dan.holtstam@nrm.se](mailto:dan.holtstam@nrm.se))

- [ejm-36-311-2024-supplement-title-page.pdf](#)
- [2021-035\\_IGELSTRÖMITE.cif](#)
- [2022-129\\_MANGANOSCHAFARIKITE.cif](#)

The copyright of individual parts of the supplement might differ from the article licence.
